# Supplementary material for: Underrated Innovativeness of Micro-Enterprises Compared to Small to Medium Enterprises in the Slovenian Forest-Wood Sector
Source: MDPI journal article supplement (doi:10.3390/su14041991), 2022-02-10
Supplement: s1 [file Document S2 Survey Invitation.pdf › Document S2 Survey Invitation.pdf]

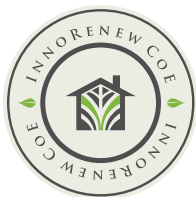

## Study on market and innovation activities

### InnoRenew CoE

Livade 6  
6310 Izola/Isola  
Slovenia

T: +386 40 282 944  
E: coe@innorenew.eu  
www.innorenew.eu

Naziv prejemnika  
Dunajska cesta 49  
1000 Ljubljana  
Slovenia

Koper, 11. 2. 2019

Dear director of [name of company],

We are inviting you to participate in a scientific study on market and innovation activities of Slovenian companies in the wood value chain. It is being carried out by the InnoRenew CoE, a non-profit private research institute focused on wood modification and the use of renewable materials and sustainable buildings.

We found your contact information in the Bizi.si business registry. Your company was selected to participate because its main activity is [A02.100] (Siviculture and other activities).

Please find enclosed a questionnaire that includes questions on innovation and managerial strategies and activities. Completing the questionnaire will take you between **about 10 minutes** (if you do not have innovation activities) or **about 15 minutes** (if you have innovation activities).

Please respond to the questionnaire **before the 28th of February 2019**. You can either fill out the enclosed paper questionnaire and mail it back using the return envelope or you may fill out the questionnaire online following this link: <https://innorenew.eu/shortlink>.

We are also enclosing an information sheet with a glossary of terms used in the questionnaire and Frequently Asked Questions about the project. If you have further questions you can send an e-mail to [surveys@innorenew.eu](mailto:surveys@innorenew.eu) or call us at 031 472 777 (contact person: Barbara Rovere).

Thank you very much for your participation.

Dr. Andreja Kutnar
