# Supplementary material for: Underrated Innovativeness of Micro-Enterprises Compared to Small to Medium Enterprises in the Slovenian Forest-Wood Sector
Source: MDPI journal article supplement (doi:10.3390/su14041991), 2022-02-10
Supplement: s1 [file Document S3 Information Sheet with Frequently Asked Questions.pdf › Document S3 Information Sheet with Frequently Asked Questions.pdf]

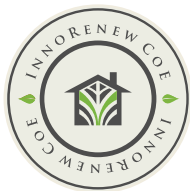

**InnoRenew CoE**

Livade 6, 6310 Izola/Isola, Slovenia, T: +386 40 282 944, E: [coe@innorenew.eu](mailto:coe@innorenew.eu), [www.innorenew.eu](http://www.innorenew.eu)

## Frequently asked questions

### What is the purpose of the study?

The objectives of the study are to identify the state of innovation practices and to identify models to stimulate them.

### What are the benefits and risks of participating?

There are no reasonably foreseeable risks, discomforts, or disadvantages connected to your participation. There will be no direct benefit or incentive to you, but your participation will help us design activities to stimulate innovation activities in your sector. Your participation is voluntary, and you might skip any questions you do not wish to answer.

### What if I do not want to participate in the study?

If you do not fill out the questionnaire by the end of February, we will remind you by e-mail or telephone or by sending you another letter. If you do not wish to be contacted anymore, please inform us by e-mail ([surveys@innorenew.eu](mailto:surveys@innorenew.eu)) or phone 031 472 777 (contact person: Barbara Rovere).

### Are my responses confidential?

The questionnaire contains the ID number of your company which we need to keep track of responses to avoid recontacting companies that have already responded. The database will contain only the ID numbers and not the name of your company or any other information based on which your company could be identified. Your identity will be kept confidential in all outputs and by the end of the study (in March 2022) we will permanently delete the connection between your ID number and the name.

### How is the data going to be processed?

Your responses will be transcribed from paper to digital form or exported from the online database and stored for data analysis. We will add some auxiliary information provided by Bizi.si (company activity, number of employees, legal organization form, and region) but not anything that could reveal the identity of your company.

### How are you going to use my responses?

Processed data will be used in research publications, for education purposes, and for future research. The published dataset will not be limited to the InnoRenew research group but also third parties will be able to access and processed anonymised data deposited on the Zenodo open research data platform. As a participant you can receive a summary of the results upon request.

Based on your responses our research group might contact you for follow-up studies on more detailed topics related to the study.



## Glossary of terms

**Innovation** - An innovation is the introduction of a new or significantly improved product, process, organisational method, or marketing method by your enterprise. An innovation must have characteristics or intended uses that are new or which provide a significant improvement over what was previously used or sold by your enterprise. However, an innovation can fail or take time to prove itself. An innovation need only be new or significantly improved for your enterprise. It could have been originally developed or used by other enterprises or organisations.

**Product innovation** - the market introduction of a new or significantly improved good or service with respect to its capabilities, user friendliness, components or sub-systems. A **good** is usually a tangible object such as a smartphone, furniture, or packaged software, but downloadable software, music and film are also goods. A **service** is usually intangible, such as retailing, insurance, educational courses, air travel, consulting, etc. Product innovations (new or improved) must be new to your enterprise, but they do not need to be new to your market. Product innovations could have been originally developed by your enterprise or by other enterprises or organisations.

**Process innovation** - the implementation of a new or significantly improved production process, distribution method, or supporting activity. Process innovations must be new to your enterprise, but they do not need to be new to your market. The innovation could have been originally developed by your enterprise or by other enterprises or organisations.

**Organisational innovation** - a new organisational method in your enterprise's business practices (including knowledge management), workplace organisation or external relations that has not been previously used by your enterprise. It must be the result of strategic decisions taken by management. Exclude mergers or acquisitions, even if for the first time.

**Marketing innovation** - the implementation of a new marketing concept or strategy that differs significantly from your enterprise's existing marketing methods and which has not been used before. It requires significant changes in product design or packaging, product placement, product promotion or pricing. Exclude seasonal, regular and other routine changes in marketing methods.

**Innovation activities** - include the acquisition of machinery, equipment, buildings, software, and licenses; engineering and development work, feasibility studies, design, training, R&D and marketing when they are specifically undertaken to develop and/or implement a product or process innovation. This includes also all types of research and development consisting of research and development activities to create new knowledge or solve scientific or technical problems.
