# Supplementary material for: Underrated Innovativeness of Micro-Enterprises Compared to Small to Medium Enterprises in the Slovenian Forest-Wood Sector
Source: MDPI journal article supplement (doi:10.3390/su14041991), 2022-02-10
Supplement: s1 [file Document S4 Comparison of enterprises of different sizes for selected indicators.pdf › Document S4 Comparison of enterprises of different sizes for selected indicators.pdf]

**Table S1: Comparison of enterprises of different sizes for selected indicators**

|                                                                   |                                                                      | 0–1 employee (Micro) |       |     | 2–9 employees (Micro) |       |     | 10–249 employees (SME) |       |    | All enterprises |       |     | Chi-Square     |       |
|-------------------------------------------------------------------|----------------------------------------------------------------------|----------------------|-------|-----|-----------------------|-------|-----|------------------------|-------|----|-----------------|-------|-----|----------------|-------|
|                                                                   |                                                                      | f                    | %     | n   | f                     | %     | n   | f                      | %     | n  | f               | %     | n   | X <sup>2</sup> | p     |
| Highly important strategy (Q2)                                    | Improving your existing products                                     | 33                   | 31.1% | 106 | 61                    | 57.0% | 107 | 35                     | 54.7% | 64 | 129             | 46.6% | 277 | 16.53          | <0.01 |
|                                                                   | Introducing entirely new products                                    | 17                   | 17.3% | 98  | 25                    | 24.8% | 101 | 17                     | 26.6% | 64 | 59              | 22.4% | 273 | 2.40           | 0.30  |
|                                                                   | Reaching new customer groups                                         | 19                   | 19.0% | 100 | 27                    | 26.0% | 104 | 25                     | 38.5% | 65 | 71              | 26.4% | 269 | 7.70           | 0.02  |
|                                                                   | Customer specific solutions                                          | 33                   | 32.4% | 102 | 40                    | 38.5% | 104 | 33                     | 50.8% | 65 | 106             | 39.1% | 271 | 5.68           | 0.06  |
|                                                                   | Low-price                                                            | 17                   | 17.3% | 98  | 14                    | 13.9% | 101 | 13                     | 20.3% | 64 | 44              | 16.7% | 263 | 1.21           | 0.55  |
| Introduction of new or significantly improved.... (Q3a, Q4a, Q6a) | Goods                                                                | 34                   | 31.2% | 109 | 51                    | 47.7% | 107 | 27                     | 44.3% | 61 | 112             | 40.4% | 277 | 6.56           | 0.04  |
|                                                                   | Services                                                             | 32                   | 29.9% | 107 | 50                    | 46.3% | 108 | 15                     | 24.6% | 61 | 97              | 35.1% | 276 | 10.16          | <0.01 |
|                                                                   | Production process                                                   | 34                   | 33.0% | 103 | 45                    | 45.0% | 100 | 24                     | 38.1% | 63 | 103             | 38.7% | 266 | 3.09           | 0.21  |
|                                                                   | Distribution methods                                                 | 15                   | 15.0% | 100 | 29                    | 30.2% | 96  | 13                     | 21.7% | 60 | 57              | 22.3% | 256 | 6.56           | 0.04  |
|                                                                   | Supporting activities for processes                                  | 13                   | 13.0% | 100 | 29                    | 29.9% | 97  | 28                     | 45.9% | 61 | 70              | 27.1% | 258 | 21.35          | <0.01 |
| Goods innovations (Q3b)                                           | Your enterprise by itself                                            | 29                   | 87.9% | 33  | 34                    | 82.9% | 41  | 21                     | 72.4% | 29 | 84              | 81.6% | 103 | 2.54           | 0.28  |
|                                                                   | ...together with other enterprises or organisations                  | 6                    | 54.5% | 11  | 14                    | 63.6% | 22  | 11                     | 42.3% | 26 | 31              | 52.5% | 59  | 2.2            | 0.33  |
|                                                                   | ...by adapt. or modifying processes originally developed by other... | 4                    | 30.8% | 13  | 5                     | 27.8% | 18  | 7                      | 33.3% | 21 | 16              | 30.8% | 52  | 0.14           | 0.93  |
|                                                                   | Other enterprises or organisations                                   | 3                    | 27.3% | 11  | 9                     | 42.9% | 21  | 3                      | 15.8% | 19 | 15              | 29.4% | 51  | 3.55           | 0.17  |
| Service innovations (Q4b)                                         | Your enterprise by itself                                            | 23                   | 79.3% | 29  | 32                    | 78.0% | 41  | 9                      | 56.3% | 16 | 64              | 74.4% | 86  | 3.42           | 0.18  |
|                                                                   | ...together with other enterprises or organisations                  | 12                   | 70.6% | 17  | 12                    | 54.5% | 22  | 7                      | 46.7% | 15 | 31              | 57.4% | 54  | 1.99           | 0.37  |
|                                                                   | ...by adapt. or modifying processes originally developed by other... | 1                    | 7.1%  | 14  | 8                     | 42.1% | 19  | 2                      | 15.4% | 13 | 11              | 23.9% | 46  | 6.14           | 0.05  |
|                                                                   | Other enterprises or organisations                                   | 3                    | 20.0% | 15  | 9                     | 45.0% | 20  | 3                      | 21.4% | 14 | 15              | 30.6% | 49  | 3.3            | 0.19  |
| Processes innovations (Q6b)                                       | Your enterprise by itself                                            | 29                   | 80.6% | 36  | 36                    | 73.5% | 49  | 23                     | 60.5% | 38 | 88              | 71.5% | 123 | 3.79           | 0.15  |
|                                                                   | ...together with other enterprises or organisations                  | 11                   | 52.4% | 21  | 20                    | 58.8% | 34  | 12                     | 44.4% | 27 | 43              | 52.4% | 82  | 1.25           | 0.54  |
|                                                                   | ...by adapt. or modifying processes originally developed by other... | 1                    | 7.1%  | 14  | 8                     | 32.0% | 25  | 3                      | 13.0% | 23 | 12              | 19.4% | 62  | 4.49           | 0.11  |
|                                                                   | Other enterprises or organisations                                   | 9                    | 50.0% | 18  | 7                     | 26.9% | 26  | 10                     | 37.0% | 27 | 26              | 36.6% | 71  | 2.44           | 0.3   |
| Product innovations (Q5)                                          | New to your market                                                   | 15                   | 45.5% | 33  | 25                    | 56.8% | 44  | 15                     | 57.7% | 26 | 55              | 53.4% | 103 | 1.24           | 0.54  |
|                                                                   | Only new to your enterprise                                          | 20                   | 55.6% | 36  | 33                    | 76.7% | 43  | 15                     | 65.2% | 23 | 68              | 66.7% | 102 | 3.99           | 0.14  |
| Innovation activities that did not result in innovations (Q7)     | Abandoned or suspended                                               | 12                   | 12.2% | 98  | 9                     | 9.7%  | 93  | 7                      | 13.2% | 53 | 28              | 11.5% | 244 | 0.51           | 0.76  |
|                                                                   | Still ongoing                                                        | 11                   | 12.1% | 91  | 17                    | 19.1% | 89  | 11                     | 21.2% | 52 | 39              | 16.8% | 232 | 2.49           | 0.29  |

|                                                             |                                                                              | 0–1 employee (Micro) |       |    | 2–9 employees (Micro) |       |    | 10–249 employees (SME) |       |    | All enterprises |       |     | Chi-Square     |       |
|-------------------------------------------------------------|------------------------------------------------------------------------------|----------------------|-------|----|-----------------------|-------|----|------------------------|-------|----|-----------------|-------|-----|----------------|-------|
|                                                             |                                                                              | f                    | %     | n  | f                     | %     | n  | f                      | %     | n  | f               | %     | n   | X <sup>2</sup> | p     |
| Engagement in innovation activities (Q8a)                   | In-house R&D                                                                 | 15                   | 71.4% | 21 | 24                    | 68.6% | 35 | 18                     | 69.2% | 26 | 57              | 69.5% | 82  | 0.52           | 0.97  |
|                                                             | External R&D                                                                 | 8                    | 42.1% | 19 | 11                    | 40.7% | 27 | 10                     | 43.5% | 23 | 29              | 42.0% | 69  | 0.04           | 0.98  |
|                                                             | Acquisition of machinery, equipment, software, and buildings                 | 28                   | 87.5% | 32 | 35                    | 85.4% | 41 | 27                     | 87.1% | 31 | 90              | 86.5% | 104 | 0.08           | 0.96  |
|                                                             | Acquisition of existing knowledge from other enterprises or org.             | 9                    | 47.4% | 19 | 15                    | 53.6% | 28 | 9                      | 39.1% | 23 | 33              | 47.1% | 70  | 1.06           | 0.59  |
|                                                             | Training for innovative activities                                           | 4                    | 25.0% | 16 | 13                    | 48.1% | 27 | 5                      | 25.0% | 20 | 22              | 34.9% | 63  | 3.64           | 0.16  |
|                                                             | Market introduction of innovations                                           | 4                    | 23.5% | 17 | 6                     | 26.1% | 23 | 5                      | 25.0% | 20 | 15              | 25.0% | 60  | 0.03           | 0.98  |
|                                                             | Design                                                                       | 10                   | 52.6% | 19 | 11                    | 50.0% | 22 | 9                      | 42.9% | 21 | 30              | 48.4% | 62  | 0.42           | 0.81  |
| Co-operation with other enterprises or organisations (Q10a) | A. Other enterprises within your enterprise group                            | 11                   | 33.3% | 33 | 25                    | 48.1% | 52 | 15                     | 48.4% | 31 | 51              | 44.0% | 116 | 2.12           | 0.35  |
|                                                             | B. Suppliers of equipment, materials, components, or software                | 24                   | 66.7% | 36 | 46                    | 86.8% | 53 | 31                     | 91.2% | 34 | 101             | 82.1% | 123 | 8.54           | 0.01  |
|                                                             | C. Clients or customers from the private sector                              | 18                   | 52.9% | 34 | 23                    | 46.0% | 50 | 23                     | 65.7% | 35 | 64              | 53.8% | 119 | 3.23           | 0.2   |
|                                                             | D. Clients or customers from the public sector                               | 9                    | 25.7% | 35 | 10                    | 21.3% | 47 | 4                      | 13.8% | 29 | 23              | 20.7% | 111 | 1.39           | 0.5   |
|                                                             | E. Competitors or other enterprises in your sector                           | 9                    | 27.3% | 33 | 12                    | 24.0% | 50 | 8                      | 25.8% | 31 | 29              | 25.4% | 114 | 0.12           | 0.94  |
|                                                             | F. Consultants or commercial labs                                            | 3                    | 9.1%  | 33 | 9                     | 18.0% | 50 | 7                      | 22.6% | 31 | 19              | 16.7% | 114 | 2.21           | 0.33  |
|                                                             | G. Universities or other higher education institutes                         | 3                    | 9.1%  | 33 | 6                     | 12.5% | 48 | 8                      | 25.0% | 32 | 17              | 15.0% | 113 | 3.64           | 0.16  |
|                                                             | H. Government, public or private research institutes                         | 4                    | 12.1% | 33 | 3                     | 6.4%  | 47 | 7                      | 21.9% | 32 | 14              | 12.5% | 112 | 4.18           | 0.12  |
| Innovations with environmental benefits (Q16a)              | A. Reduced material or water use per unit of output                          | 10                   | 27.8% | 36 | 16                    | 34.0% | 47 | 11                     | 33.3% | 33 | 37              | 31.9% | 116 | 0.41           | 0.81  |
|                                                             | B. Reduced energy use or CO <sub>2</sub> ‘footprint’                         | 10                   | 28.6% | 35 | 23                    | 45.1% | 51 | 22                     | 66.7% | 33 | 55              | 46.2% | 119 | 9.96           | <0.01 |
|                                                             | C. Reduced air, water, noise, or soil pollution                              | 13                   | 36.1% | 36 | 25                    | 50.0% | 50 | 19                     | 57.6% | 33 | 57              | 47.9% | 119 | 3.33           | 0.19  |
|                                                             | D. Replaced a share of materials with less polluting or hazardous substances | 10                   | 27.8% | 36 | 14                    | 28.0% | 50 | 15                     | 45.5% | 33 | 39              | 32.8% | 119 | 3.33           | 0.19  |
|                                                             | E. Replaced a share of fossil energy with renewable energy sources           | 4                    | 10.8% | 37 | 11                    | 22.4% | 49 | 9                      | 28.1% | 32 | 24              | 20.3% | 118 | 3.41           | 0.18  |
|                                                             | F. Recycled waste, water, or materials for own use or sale                   | 6                    | 16.7% | 36 | 26                    | 52.0% | 50 | 11                     | 34.4% | 32 | 43              | 36.4% | 118 | 11.36          | <0.01 |
|                                                             | G. Facilitated recycling of product...                                       | 11                   | 30.6% | 36 | 13                    | 27.1% | 48 | 12                     | 37.5% | 32 | 36              | 31.0% | 116 | 0.98           | 0.61  |
|                                                             | H. Extended product life through longer-lasting, more durable products       | 12                   | 34.3% | 35 | 22                    | 43.1% | 51 | 11                     | 34.4% | 32 | 45              | 38.1% | 118 | 0.95           | 0.62  |
